# Supplementary material for: Investigating the role of multiple categorization tasks in a curriculum designed around mechanistic patterns and principles
Source: Royal Society of Chemistry journal article supplement (doi:10.1039/d1rp00267h), 2022-01-01

Appendix 2

Q-Q plots for figure 5 and 6 data

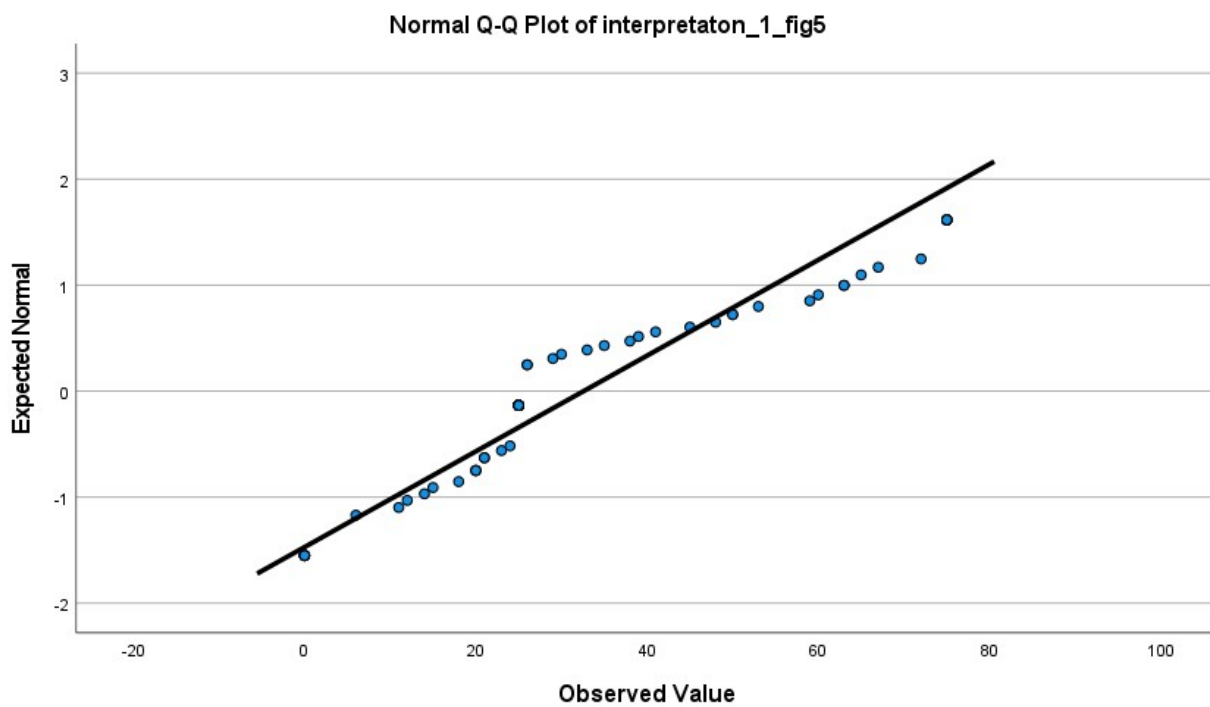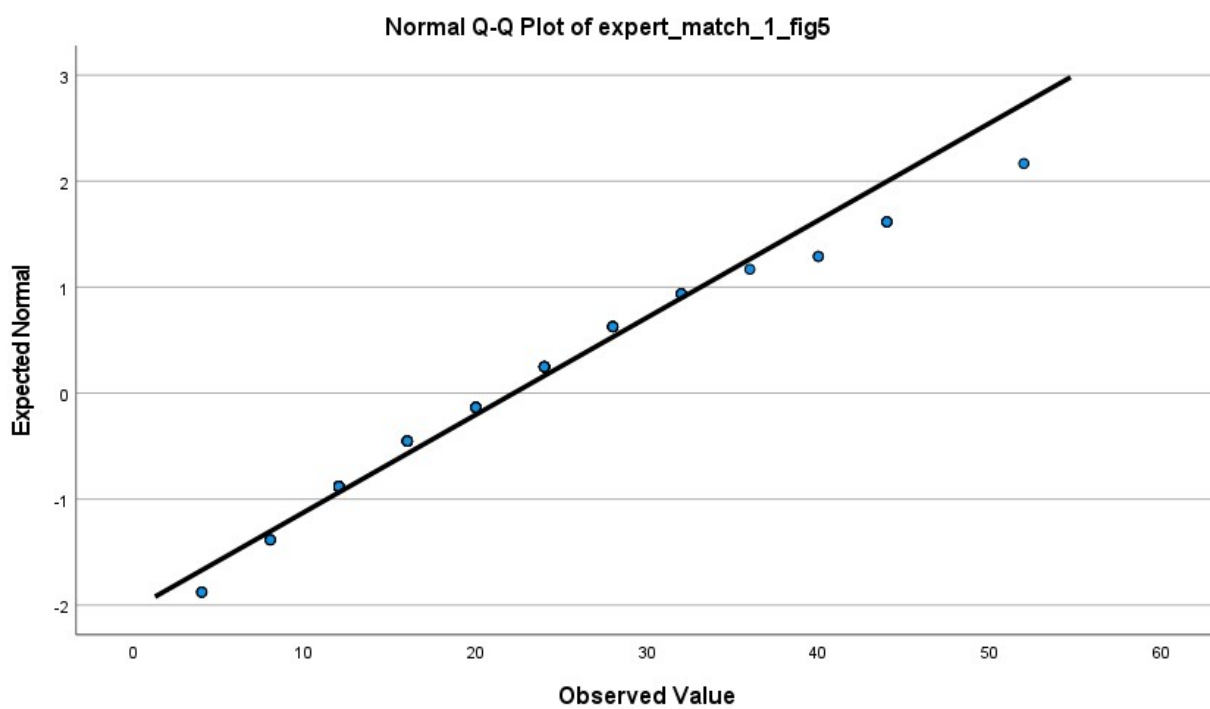

Normal Q-Q Plot of Exam\_Match\_Expert\_fig6

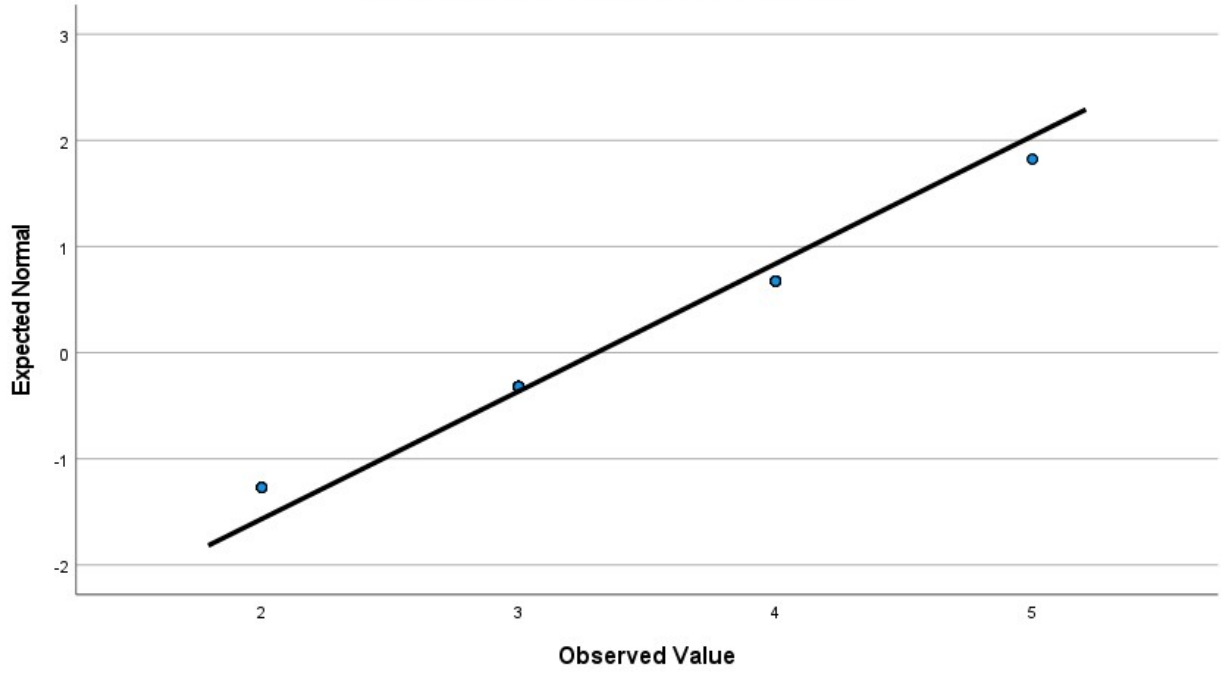

Normal Q-Q Plot of Low\_stakes\_closed\_sort\_Match\_expert\_fig6

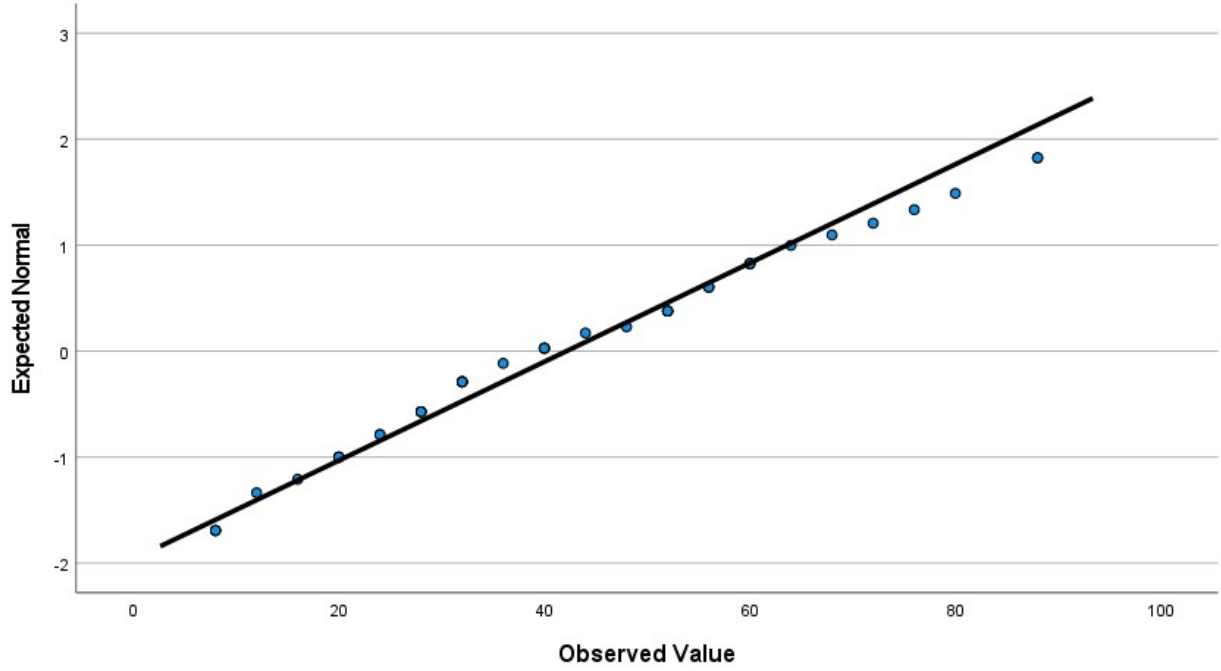

Supplement: d1rp00267h1.pdf [file d1rp00267h1.pdf]
