# Supplementary material for: Investigating the role of multiple categorization tasks in a curriculum designed around mechanistic patterns and principles
Source: Royal Society of Chemistry journal article supplement (doi:10.1039/d1rp00267h), 2022-01-01
Supplement: d1rp00267h2.pdf [file d1rp00267h2.pdf]

Reaction Cards

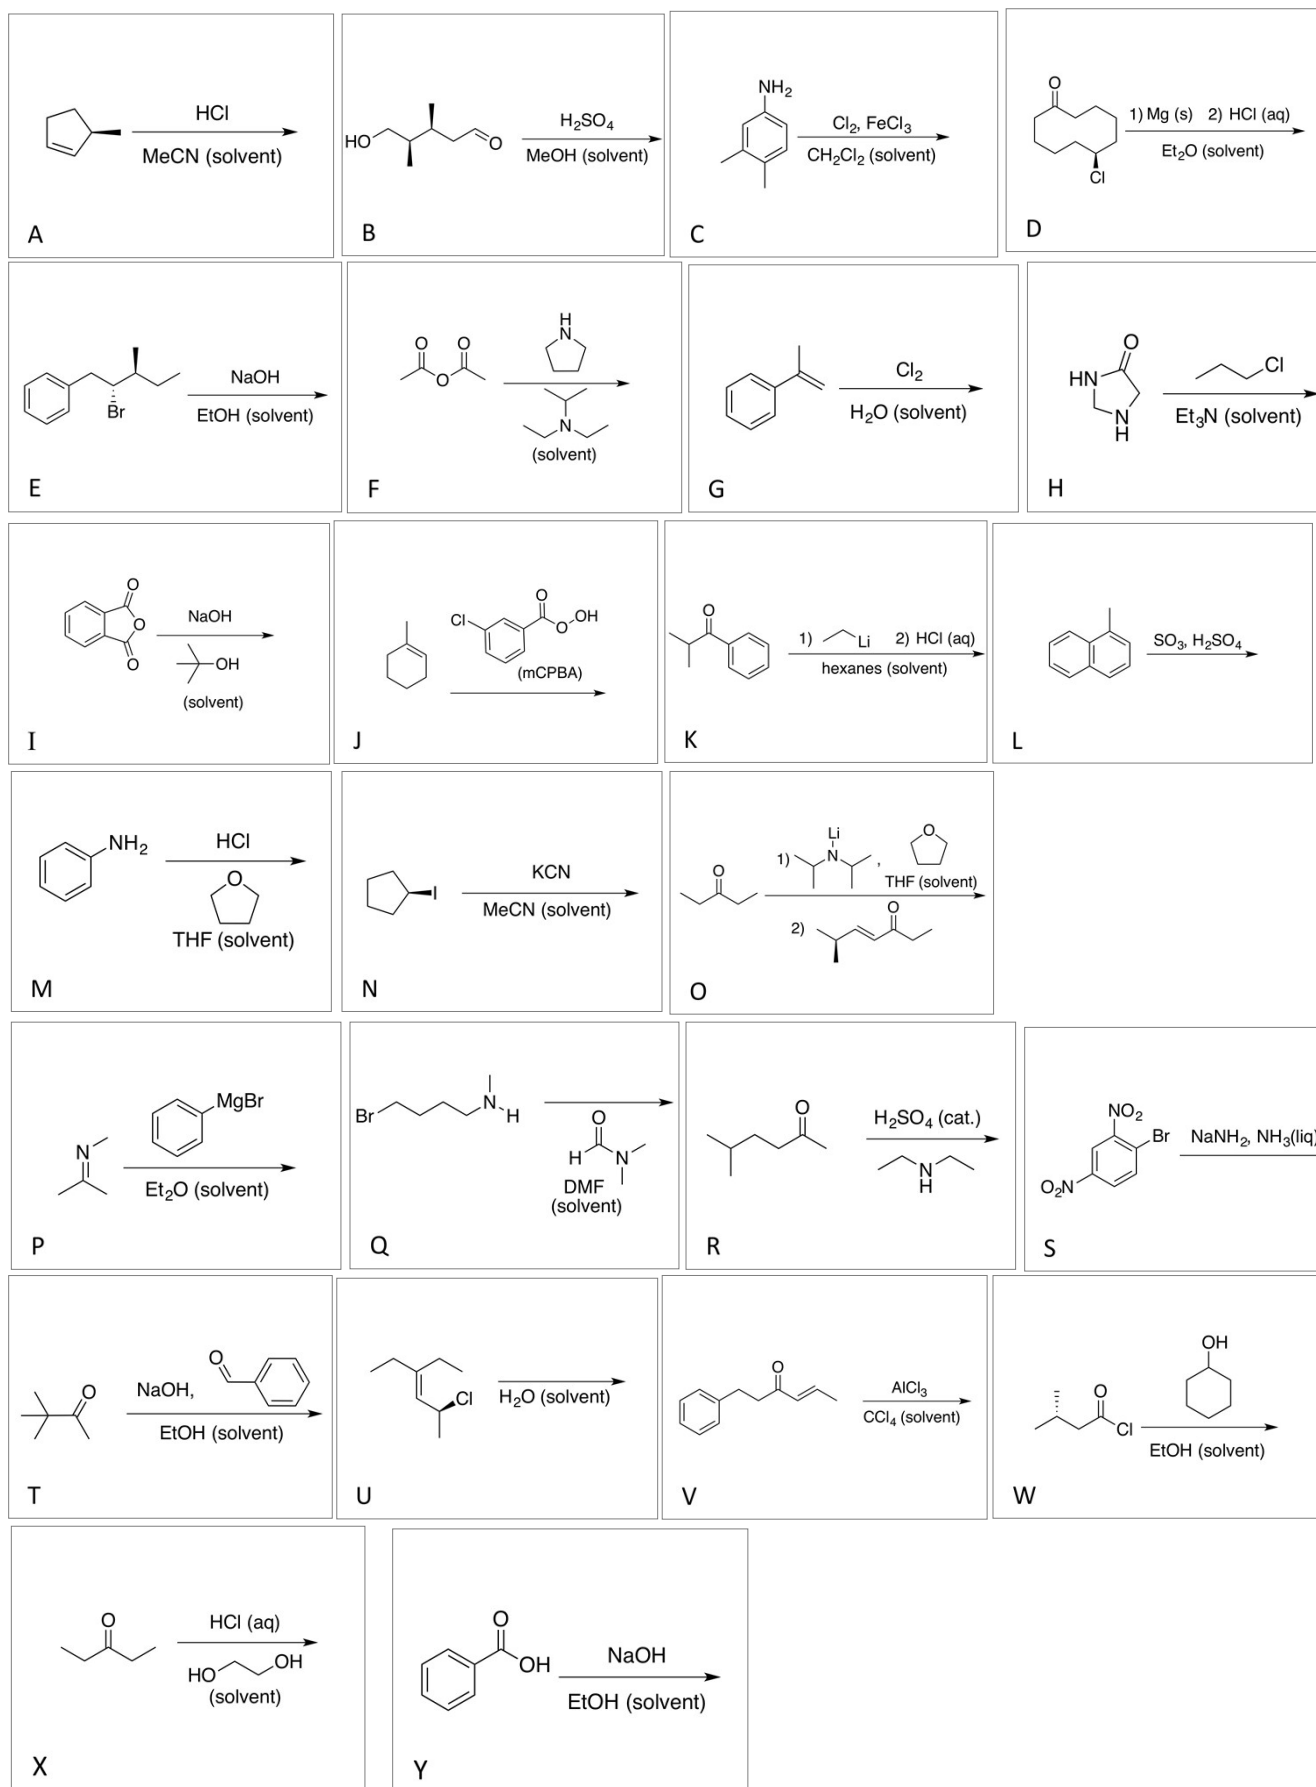

## Correlations

|                              |                              |                         |       |       |  |
|------------------------------|------------------------------|-------------------------|-------|-------|--|
| Spearman's rho               | Match with expert sort 2018  | Correlation Coefficient |       |       |  |
|                              |                              | Sig. (2-tailed)         |       |       |  |
|                              |                              | N                       |       |       |  |
|                              |                              | Bootstrap <sup>c</sup>  | Bias  |       |  |
|                              | Std. Error                   |                         |       |       |  |
|                              | BCa 95% Confidence Interval  |                         | Lower | Upper |  |
|                              | Match with expert sort 2017  | Correlation Coefficient |       |       |  |
|                              |                              | Sig. (2-tailed)         |       |       |  |
|                              |                              | N                       |       |       |  |
|                              |                              | Bootstrap <sup>c</sup>  | Bias  |       |  |
|                              | Std. Error                   |                         |       |       |  |
|                              | BCa 95% Confidence Interval  |                         | Lower | Upper |  |
|                              | Level of Interpretation 2018 | Correlation Coefficient |       |       |  |
|                              |                              | Sig. (2-tailed)         |       |       |  |
|                              |                              | N                       |       |       |  |
|                              |                              | Bootstrap <sup>c</sup>  | Bias  |       |  |
| Std. Error                   |                              |                         |       |       |  |
| BCa 95% Confidence Interval  | Lower                        |                         | Upper |       |  |
| Level of interpretation 2017 | Correlation Coefficient      |                         |       |       |  |
|                              | Sig. (2-tailed)              |                         |       |       |  |
|                              | N                            |                         |       |       |  |
|                              | Bootstrap <sup>c</sup>       | Bias                    |       |       |  |
| Std. Error                   |                              |                         |       |       |  |
| BCa 95% Confidence Interval  |                              | Lower                   | Upper |       |  |

## Correlations

|                             |                              |                         |       | Match with expert<br>sort 2018 |
|-----------------------------|------------------------------|-------------------------|-------|--------------------------------|
| Spearman's rho              | Match with expert sort 2018  | Correlation Coefficient |       | 1.000                          |
|                             |                              | Sig. (2-tailed)         |       | .                              |
|                             |                              | N                       |       | 20                             |
|                             |                              | Bootstrap <sup>c</sup>  | Bias  |                                |
|                             | Std. Error                   |                         | .000  |                                |
|                             | BCa 95% Confidence Interval  |                         | Lower | .                              |
|                             | Match with expert sort 2017  | Correlation Coefficient |       | .616**                         |
|                             |                              | Sig. (2-tailed)         |       | .004                           |
|                             |                              | N                       |       | 20                             |
|                             |                              | Bootstrap <sup>c</sup>  | Bias  |                                |
|                             | Std. Error                   |                         | .172  |                                |
|                             | BCa 95% Confidence Interval  |                         | Lower | .190                           |
|                             | Level of Interpretation 2018 | Correlation Coefficient |       | -.100                          |
|                             |                              | Sig. (2-tailed)         |       | .675                           |
|                             |                              | N                       |       | 20                             |
|                             |                              | Bootstrap <sup>c</sup>  | Bias  |                                |
| Std. Error                  |                              |                         | .268  |                                |
| BCa 95% Confidence Interval | Lower                        |                         | -.581 |                                |

[Type text]

[Type text]

[Type text] 2

|                              |                         |       |       |
|------------------------------|-------------------------|-------|-------|
|                              |                         | Upper | .342  |
| Level of interpretation 2017 | Correlation Coefficient |       | .397  |
|                              | Sig. (2-tailed)         |       | .083  |
|                              | N                       |       | 20    |
|                              | Bootstrap <sup>c</sup>  | Bias  | -.012 |
| Std. Error                   |                         | .215  |       |
| BCa 95% Confidence Interval  |                         | Lower | -.049 |
|                              |                         | Upper | .730  |

### Correlations

|                              |                             | Match with expert sort 2017 |                             |        |
|------------------------------|-----------------------------|-----------------------------|-----------------------------|--------|
| Spearman's rho               | Match with expert sort 2018 | Correlation Coefficient     |                             | .616** |
|                              |                             | Sig. (2-tailed)             |                             | .004   |
|                              |                             | N                           |                             | 20     |
|                              |                             | Bootstrap <sup>c</sup>      | Bias                        | -.006  |
|                              |                             |                             | Std. Error                  | .172   |
|                              |                             |                             | BCa 95% Confidence Interval | Lower  |
|                              |                             |                             | Upper                       | .916   |
|                              | Match with expert sort 2017 | Correlation Coefficient     |                             | 1.000  |
|                              |                             | Sig. (2-tailed)             |                             | .      |
|                              |                             | N                           |                             | 20     |
|                              |                             | Bootstrap <sup>c</sup>      | Bias                        | .000   |
|                              |                             |                             | Std. Error                  | .000   |
|                              |                             |                             | BCa 95% Confidence Interval | Lower  |
|                              |                             | Upper                       | .                           |        |
| Level of Interpretation 2018 | Correlation Coefficient     |                             | -.084                       |        |
|                              | Sig. (2-tailed)             |                             | .725                        |        |
|                              | N                           |                             | 20                          |        |
|                              | Bootstrap <sup>c</sup>      | Bias                        | -.013                       |        |
|                              |                             | Std. Error                  | .233                        |        |
|                              |                             | BCa 95% Confidence Interval | Lower                       | -.528  |
|                              |                             | Upper                       | .300                        |        |
| Level of interpretation 2017 | Correlation Coefficient     |                             | .283                        |        |
|                              | Sig. (2-tailed)             |                             | .226                        |        |
|                              | N                           |                             | 20                          |        |
|                              | Bootstrap <sup>c</sup>      | Bias                        | -.006                       |        |
|                              |                             | Std. Error                  | .229                        |        |
|                              |                             | BCa 95% Confidence Interval | Lower                       | -.244  |
|                              |                             | Upper                       | .703                        |        |

### Correlations

|                |                             | Level of Interpretation 2018 |                             |       |
|----------------|-----------------------------|------------------------------|-----------------------------|-------|
| Spearman's rho | Match with expert sort 2018 | Correlation Coefficient      |                             | -.100 |
|                |                             | Sig. (2-tailed)              |                             | .675  |
|                |                             | N                            |                             | 20    |
|                |                             | Bootstrap <sup>c</sup>       | Bias                        | -.013 |
|                |                             |                              | Std. Error                  | .268  |
|                |                             |                              | BCa 95% Confidence Interval | Lower |
|                |                             |                              | Upper                       | .342  |
|                | Match with expert sort 2017 | Correlation Coefficient      |                             | -.084 |
|                |                             | Sig. (2-tailed)              |                             | .725  |
|                |                             | N                            |                             | 20    |
|                |                             | Bootstrap <sup>c</sup>       | Bias                        | -.013 |
|                |                             |                              | Std. Error                  | .233  |
|                |                             |                              | BCa 95% Confidence Interval | Lower |

|                              |                         |            |       |
|------------------------------|-------------------------|------------|-------|
|                              |                         | Upper      | .300  |
| Level of Interpretation 2018 | Correlation Coefficient |            | 1.000 |
|                              | Sig. (2-tailed)         |            | .     |
|                              | N                       |            | 20    |
|                              | Bootstrap <sup>c</sup>  | Bias       | .000  |
|                              |                         | Std. Error | .000  |
| BCa 95% Confidence Interval  |                         | Lower      | .     |
|                              |                         | Upper      | .     |
| Level of interpretation 2017 | Correlation Coefficient |            | -.144 |
|                              | Sig. (2-tailed)         |            | .544  |
|                              | N                       |            | 20    |
|                              | Bootstrap <sup>c</sup>  | Bias       | .003  |
|                              |                         | Std. Error | .248  |
| BCa 95% Confidence Interval  |                         | Lower      | -.523 |
|                              |                         | Upper      | .283  |

### Correlations

|                              |                              |                         |            | Level of interpretation 2017 |
|------------------------------|------------------------------|-------------------------|------------|------------------------------|
| Spearman's rho               | Match with expert sort 2018  | Correlation Coefficient |            | .397                         |
|                              |                              | Sig. (2-tailed)         |            | .083                         |
|                              |                              | N                       |            | 20                           |
|                              |                              | Bootstrap <sup>c</sup>  | Bias       | -.012                        |
|                              |                              |                         | Std. Error | .215                         |
|                              | BCa 95% Confidence Interval  |                         | Lower      | -.049                        |
|                              |                              |                         | Upper      | .730                         |
|                              | Match with expert sort 2017  | Correlation Coefficient |            | .283                         |
|                              |                              | Sig. (2-tailed)         |            | .226                         |
|                              |                              | N                       |            | 20                           |
|                              |                              | Bootstrap <sup>c</sup>  | Bias       | -.006                        |
|                              |                              |                         | Std. Error | .229                         |
|                              | BCa 95% Confidence Interval  |                         | Lower      | -.244                        |
|                              |                              |                         | Upper      | .703                         |
|                              | Level of Interpretation 2018 | Correlation Coefficient |            | -.144                        |
| Sig. (2-tailed)              |                              | .544                    |            |                              |
| N                            |                              | 20                      |            |                              |
| Bootstrap <sup>c</sup>       |                              | Bias                    | .003       |                              |
|                              |                              | Std. Error              | .248       |                              |
|                              | BCa 95% Confidence Interval  | Lower                   | -.523      |                              |
|                              |                              | Upper                   | .283       |                              |
| Level of interpretation 2017 | Correlation Coefficient      |                         | 1.000      |                              |
|                              | Sig. (2-tailed)              |                         | .          |                              |
|                              | N                            |                         | 20         |                              |
|                              | Bootstrap <sup>c</sup>       | Bias                    | .000       |                              |
|                              |                              | Std. Error              | .000       |                              |
| BCa 95% Confidence Interval  |                              | Lower                   | .          |                              |
|                              |                              | Upper                   | .          |                              |
